# Supplementary material
Source: MDPI journal article supplement (https://www.mdpi.com/2073-4344/13/1/187)
Supplement: s1 [file s1]

# **Computational Study on the Catalytic Performance of Single-Atom Catalysts**

## **Anchored on g-CN for Electrochemical Oxidation of Formic Acid**

*Abdul Qadeer,<sup>a,#</sup> Meiqi Yang,<sup>a,#</sup> Yuejie Liu,<sup>b,\*</sup> Qinghai Cai,<sup>a,c</sup> Jingxiang Zhao<sup>a,\*</sup>*

*<sup>a</sup> College of Chemistry and Chemical Engineering, Key Laboratory of Photonic and Electronic Bandgap Materials, Ministry of Education, Harbin Normal University, Harbin, 150025, China*

*<sup>b</sup> Modern Experiment Center, Harbin Normal University, Harbin 150025, China*

*<sup>c</sup> Collaborative Innovation Center of Cold Region Ecological Safety, Harbin 150025, China*

*\* correspondence: liuyuejie@hrbnu.edu.cn (Y. Liu); zhaojingxiang@hrbnu.edu.cn (J. Zhao)*

*<sup>#</sup> Abdul Qadeer and Meiqi Yang contribute equally to this work.*

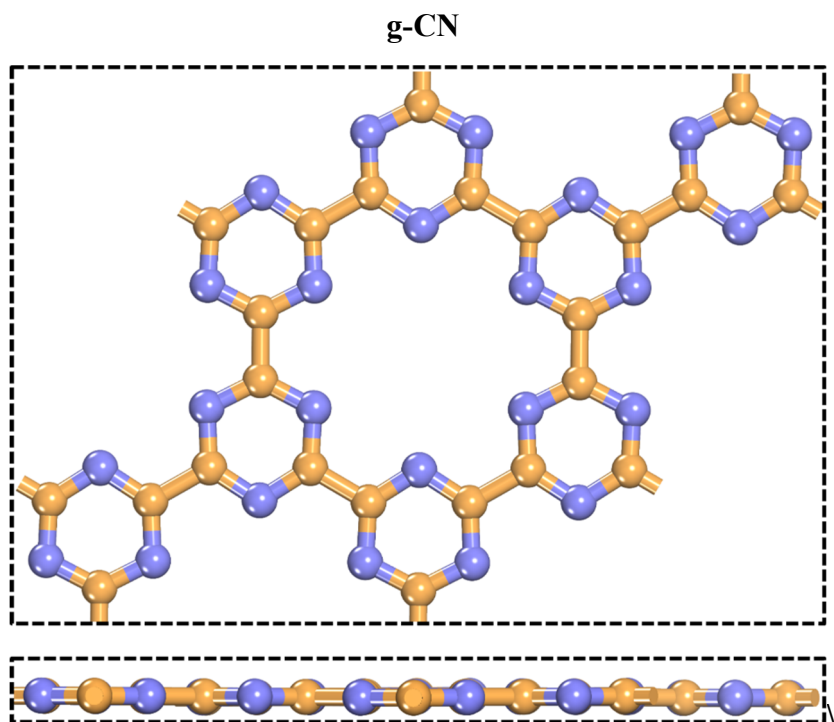

|           |           |           |
|-----------|-----------|-----------|
| g-CN      |           |           |
| 1.0       |           |           |
| 14.223100 | 0.000000  | 0.000000  |
| -7.111550 | 12.317566 | 0.000000  |
| 0.000000  | 0.000000  | 20.000000 |
| C         | N         |           |
| 24        | 24        |           |
| Direct    |           |           |
| 0.219300  | 0.438470  | 0.499170  |
| 0.060860  | 0.280060  | 0.498660  |
| 0.219280  | 0.280020  | 0.499310  |
| 0.280310  | 0.060520  | 0.500490  |
| 0.438740  | 0.218940  | 0.500040  |
| 0.280300  | 0.218950  | 0.499630  |
| 0.719220  | 0.438450  | 0.499820  |
| 0.560830  | 0.280000  | 0.499880  |
| 0.719280  | 0.280050  | 0.499190  |
| 0.780340  | 0.060580  | 0.498510  |
| 0.938760  | 0.219010  | 0.498390  |
| 0.780320  | 0.218990  | 0.498640  |
| 0.219250  | 0.938430  | 0.500740  |
| 0.060820  | 0.780000  | 0.500780  |
| 0.219260  | 0.780000  | 0.500430  |
| 0.280340  | 0.560550  | 0.499470  |
| 0.438770  | 0.719000  | 0.499540  |

|          |          |          |
|----------|----------|----------|
| 0.280310 | 0.718960 | 0.500130 |
| 0.719290 | 0.938480 | 0.498840 |
| 0.560850 | 0.780060 | 0.499310 |
| 0.719290 | 0.780050 | 0.499440 |
| 0.780260 | 0.560530 | 0.500010 |
| 0.938720 | 0.718950 | 0.500530 |
| 0.780310 | 0.718980 | 0.499760 |
| 0.388910 | 0.277710 | 0.499570 |
| 0.221470 | 0.110330 | 0.499920 |
| 0.388960 | 0.110330 | 0.500730 |
| 0.110680 | 0.221280 | 0.499010 |
| 0.278120 | 0.388640 | 0.499470 |
| 0.110660 | 0.388680 | 0.498650 |
| 0.388920 | 0.777750 | 0.500010 |
| 0.221490 | 0.610340 | 0.499950 |
| 0.388990 | 0.610380 | 0.499160 |
| 0.110660 | 0.721240 | 0.500520 |
| 0.278100 | 0.888630 | 0.500390 |
| 0.110600 | 0.888620 | 0.501070 |
| 0.888920 | 0.277770 | 0.498520 |
| 0.721500 | 0.110380 | 0.498680 |
| 0.888990 | 0.110390 | 0.498330 |
| 0.610670 | 0.221250 | 0.499390 |
| 0.778080 | 0.388660 | 0.499300 |
| 0.610580 | 0.388630 | 0.500130 |
| 0.888910 | 0.777740 | 0.500100 |
| 0.721440 | 0.610360 | 0.499610 |
| 0.888900 | 0.610330 | 0.500670 |
| 0.610690 | 0.721290 | 0.499510 |
| 0.778130 | 0.888670 | 0.499160 |
| 0.610650 | 0.888680 | 0.498890 |

**Figure S1.** The top and side view of the optimized g-CN and the corresponding coordination information.

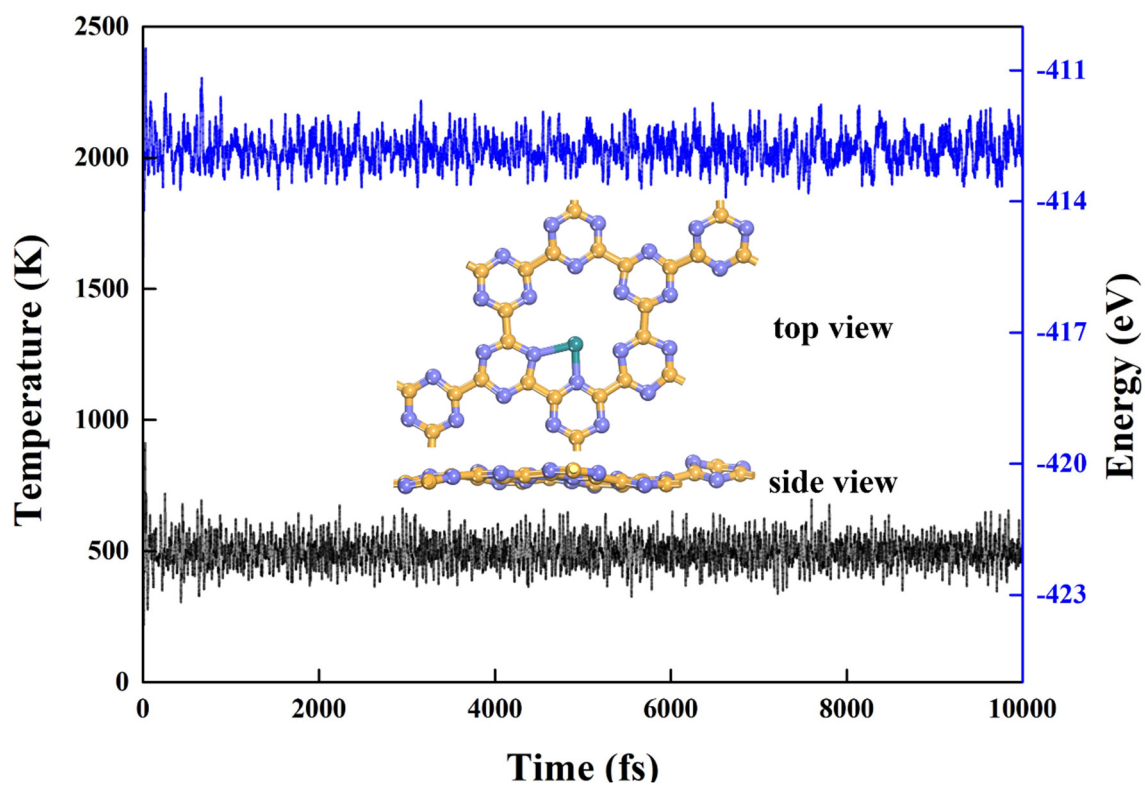

**Figure S2.** Variations of temperature and energy as a function of the time for AIMD simulations of Ru/g-CN; insert is top view of the snapshot of atomic configuration. The simulation is run under 500 K for 10 ps with a time step of 1 fs. Gray, blue and dark green spheres represent the C, N and Ru atoms, respectively.

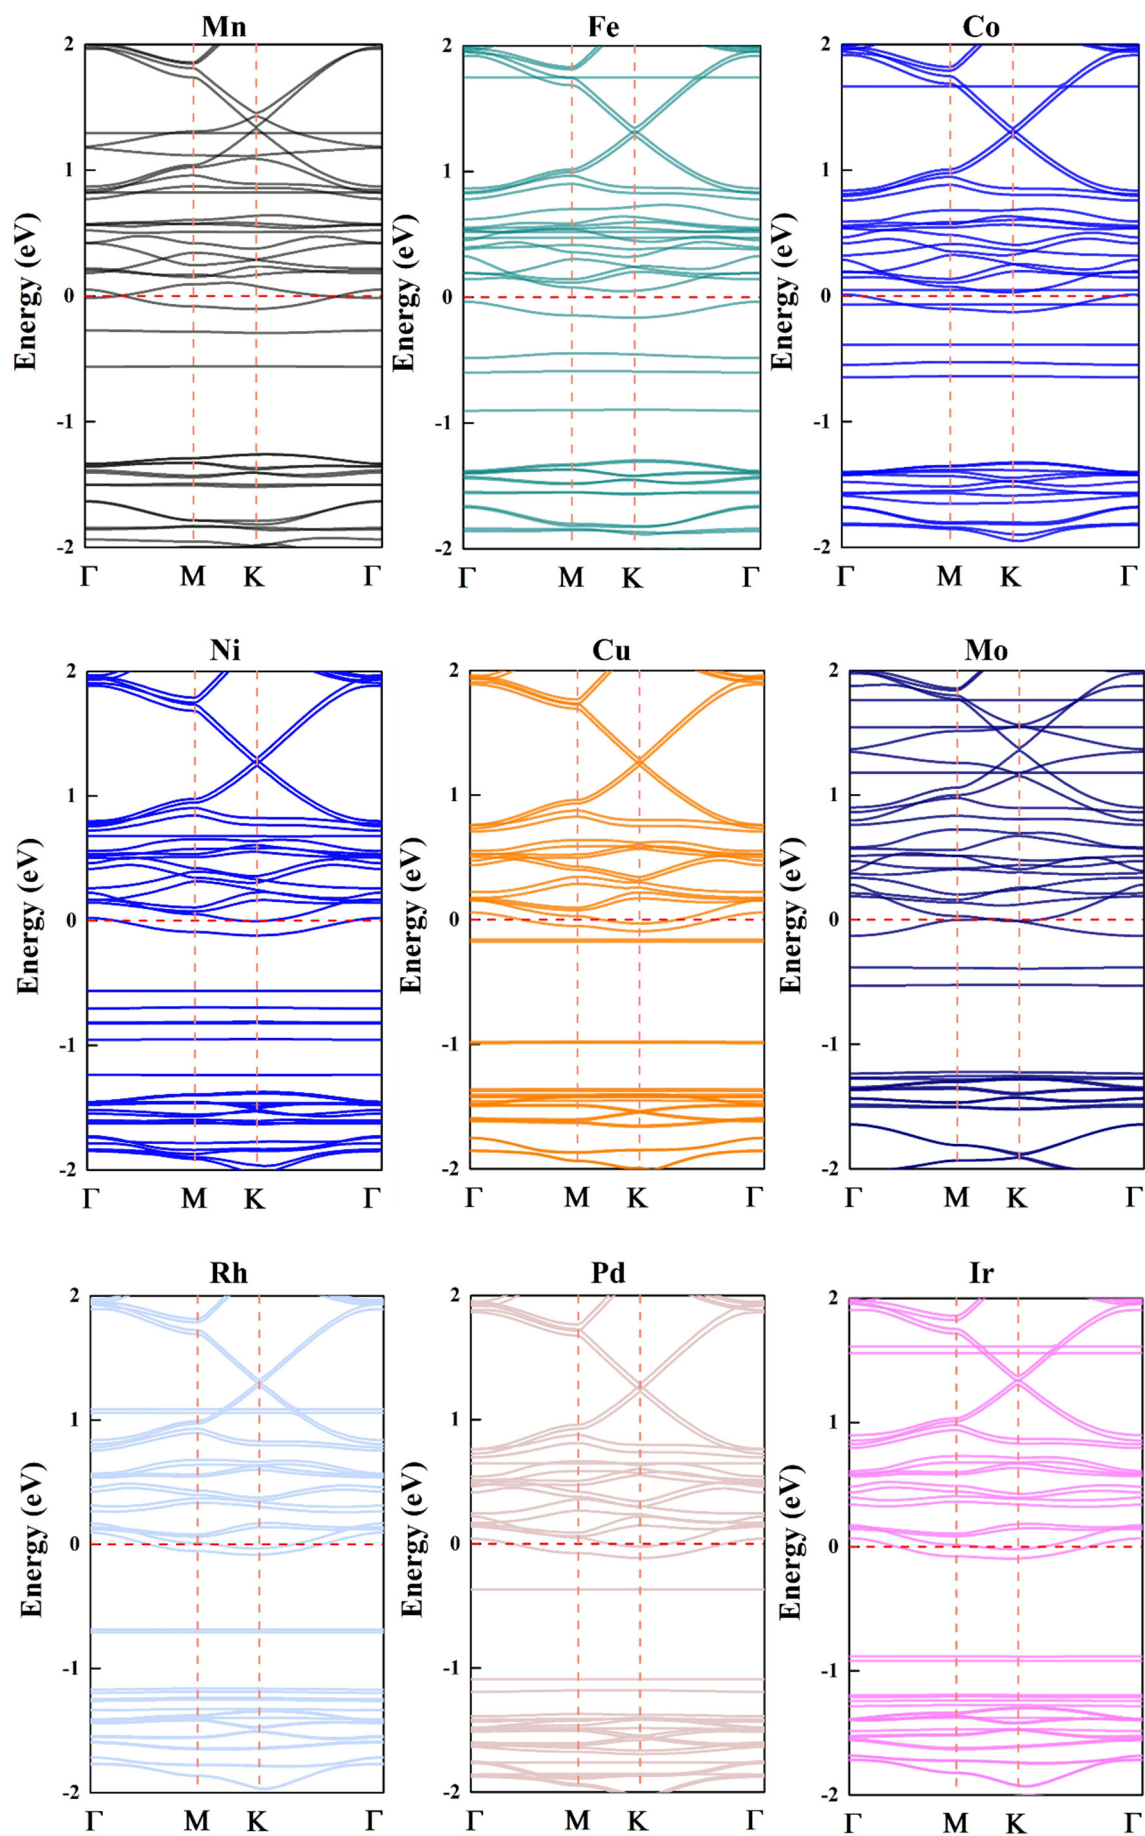

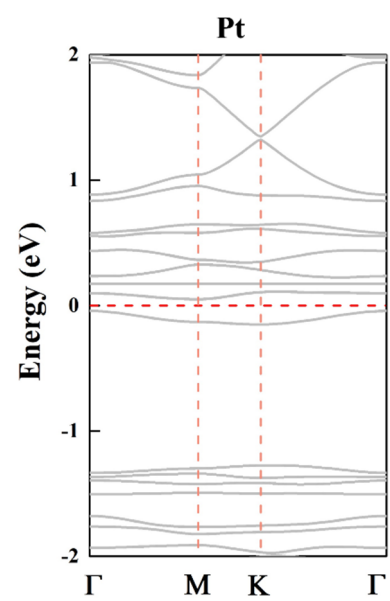

**Figure S3.** The band structure of all TM/g-CN which we considered.

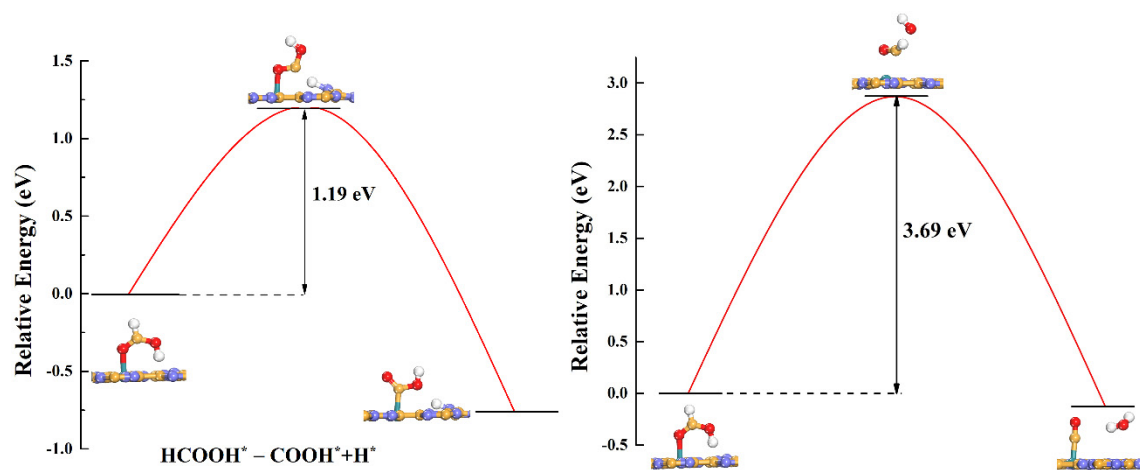

**Figure S4.** Energy barrier profiles for  $\text{HCOOH}^* - \text{COOH}^*$  and  $\text{HCOOH}^* - \text{CO}_2^* + \text{H}_2\text{O}$  on the Ru/g-CN.

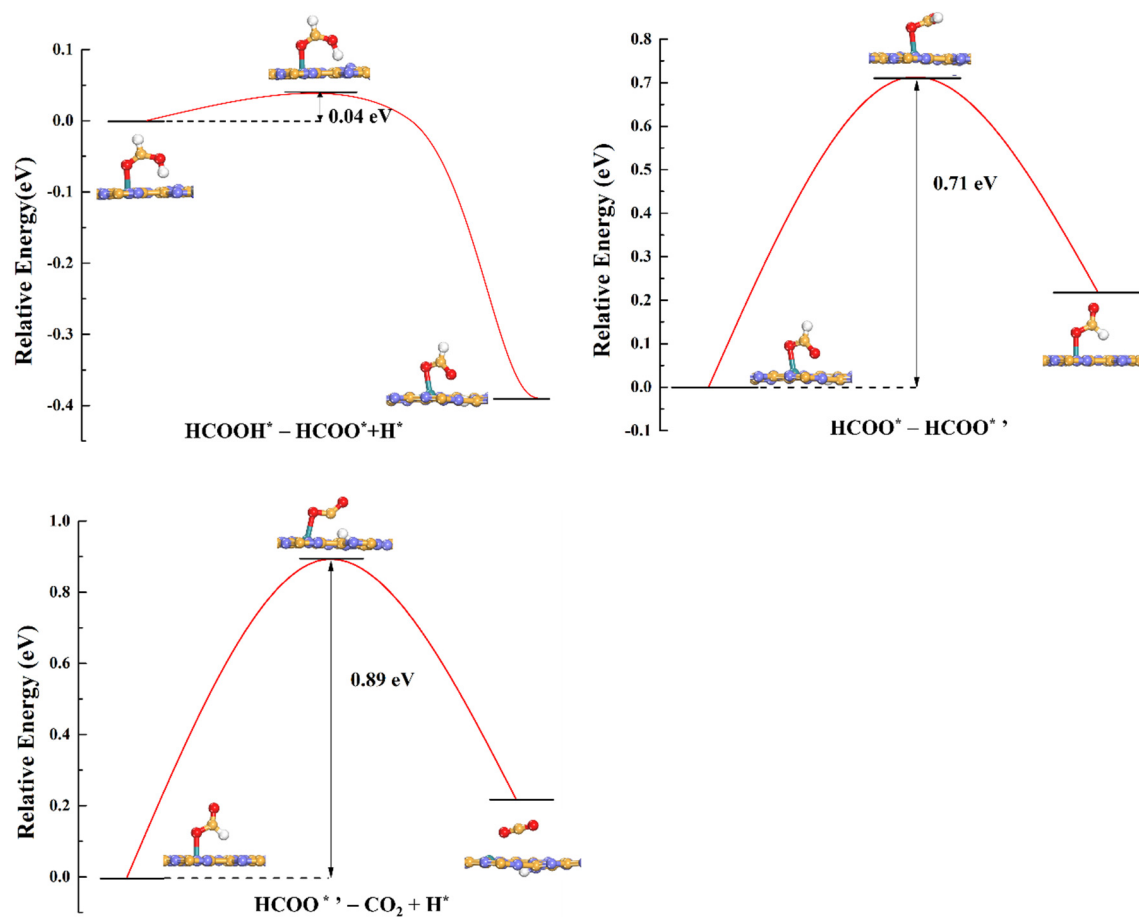

**Figure S5.** Energy barrier profiles for HCOOH decomposition on the Ru/g-CN.

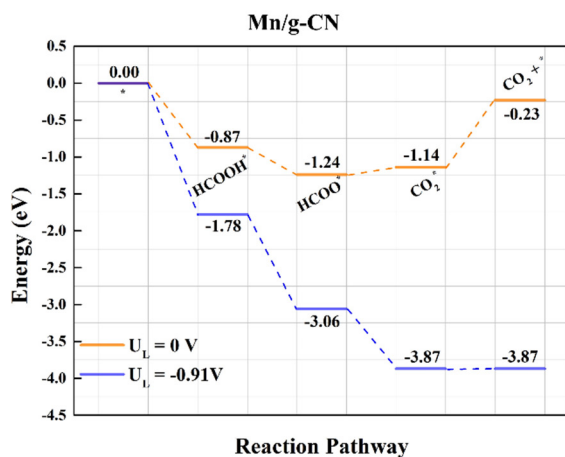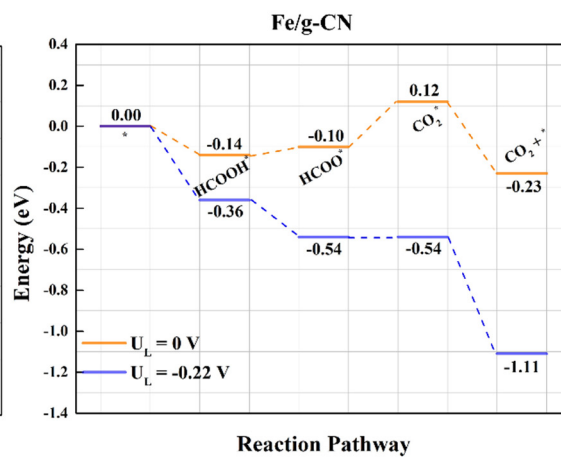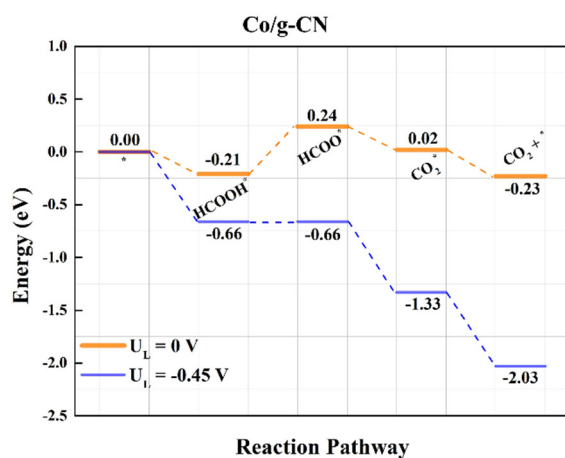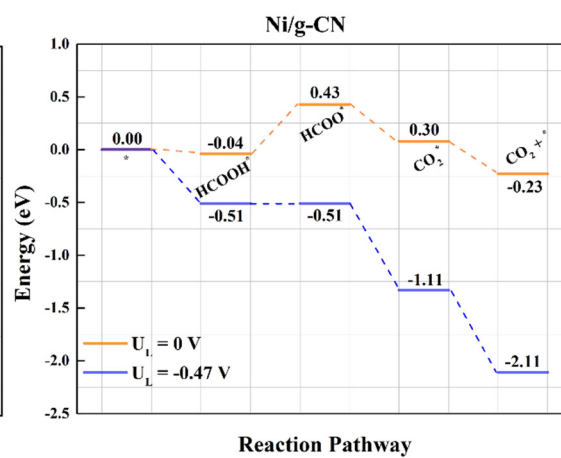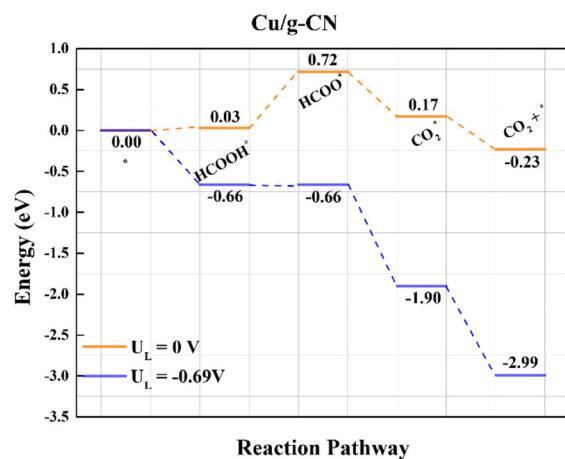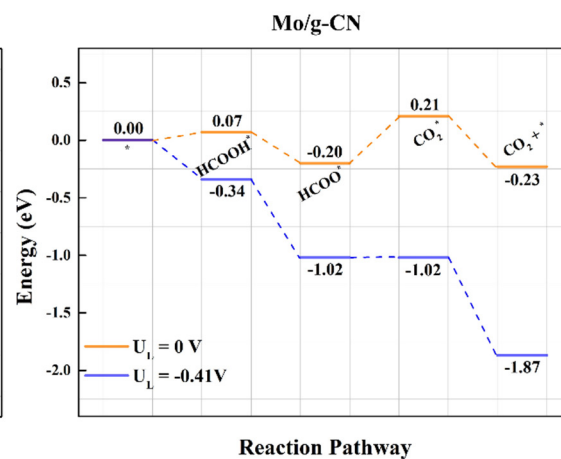

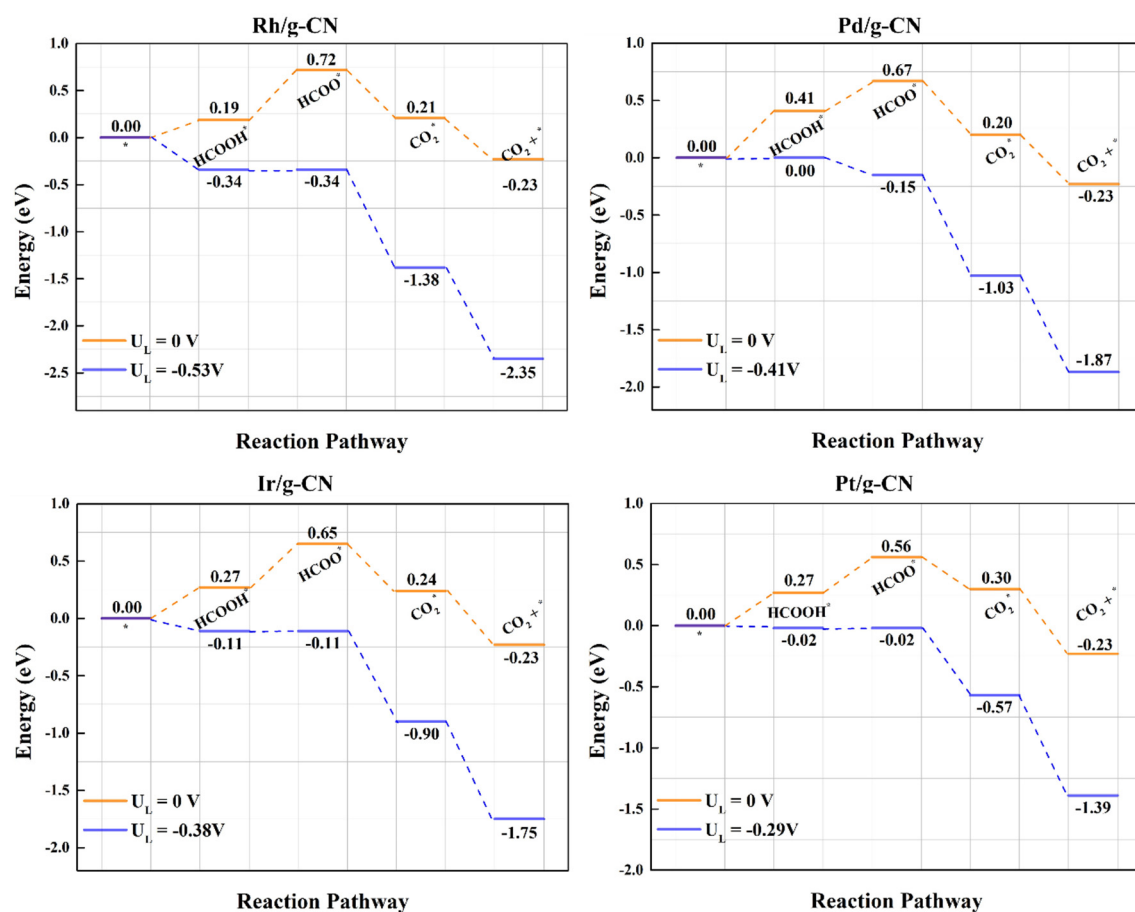

**Figure S6.** The free energy diagram of FAOR on TM/g-CN along direct pathway.
